# Supplementary material for: Behavioral origin of sound-evoked activity in mouse visual cortex
Source: PubMed Central journal article supplement (PMC9905016; doi:10.1038/s41593-022-01227-x), 2023-01-09
Supplement: 41593_2022_1227_MOESM1_ESM.pdf [file 41593_2022_1227_MOESM1_ESM.pdf]

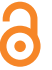

---

# Behavioral origin of sound-evoked activity in mouse visual cortex

---

In the format provided by the authors and unedited

## Supplementary information

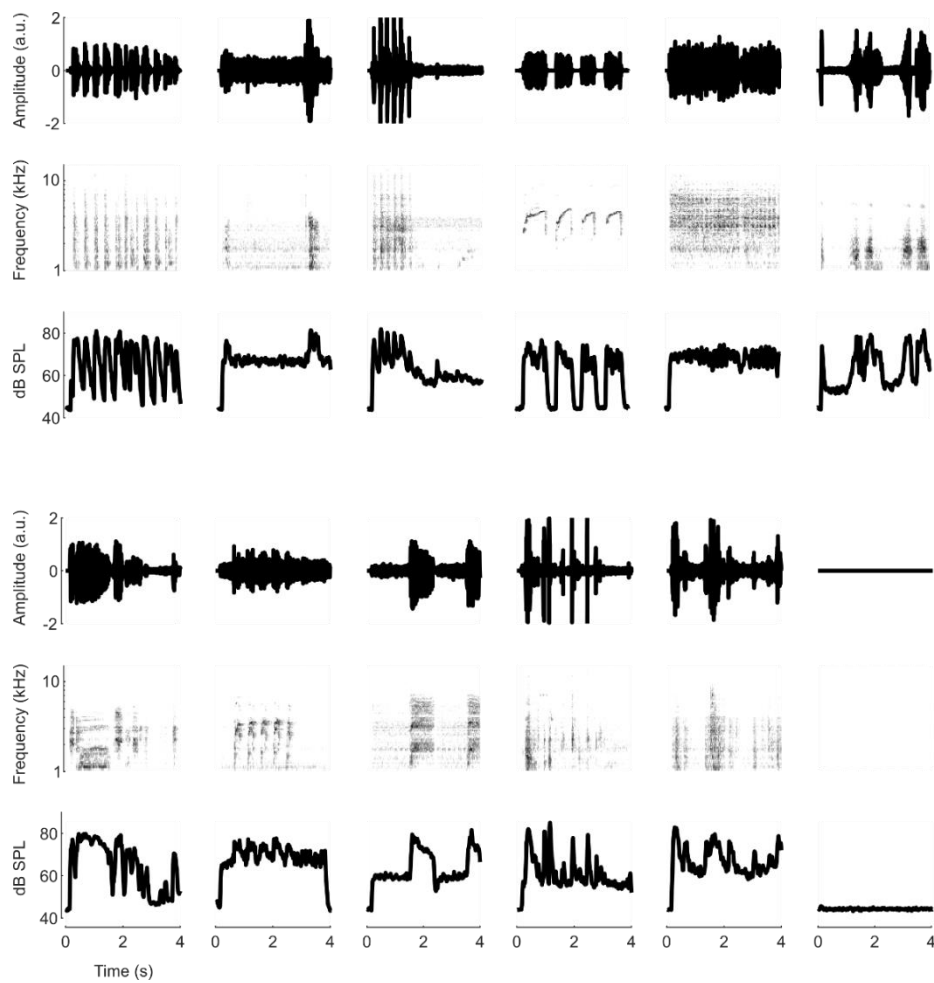

Supplementary Fig. 1. **Naturalistic sounds used in this study: spectral content and loudness.** For each of the 12 sounds, each column shows the sound amplitude (*top*), frequency spectrum (*middle*) and loudness (*bottom*).

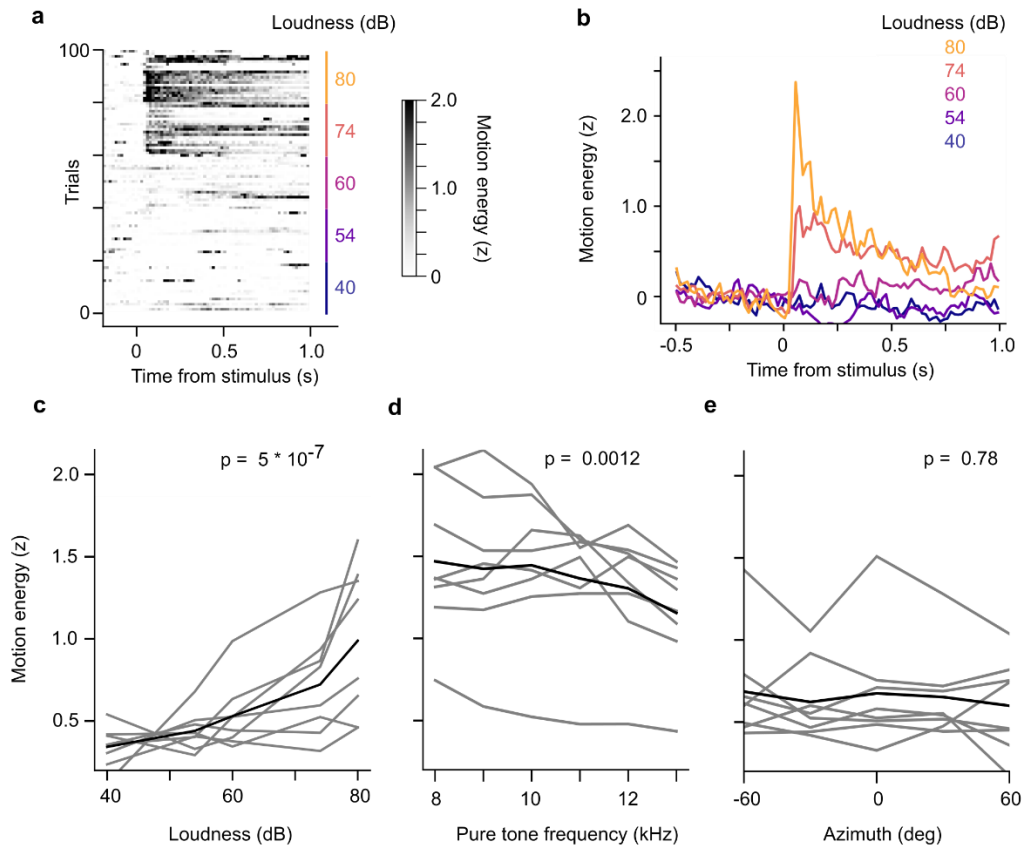

Supplementary Fig. 2. **Loudness is the main driver of uninstructed behavioral responses.** **a.** Raster of the average motion of an example mouse in response to white noise bursts of different loudness (from 40 to 80 dB SPL). **b.** Peri-stimulus time histograms of the average motion for the same example mouse for different sound volumes. **c.** Average motion energy of 6 different mice as a function of loudness. **d.** Same as **c**, but for a pure tone of different frequencies (60 dB). **e.** Same as **c**, but for a white noise burst played from different azimuthal locations (80 dB). P-values were computed using repeated-measures ANOVA with either the sound loudness, frequency, or location as a factor.

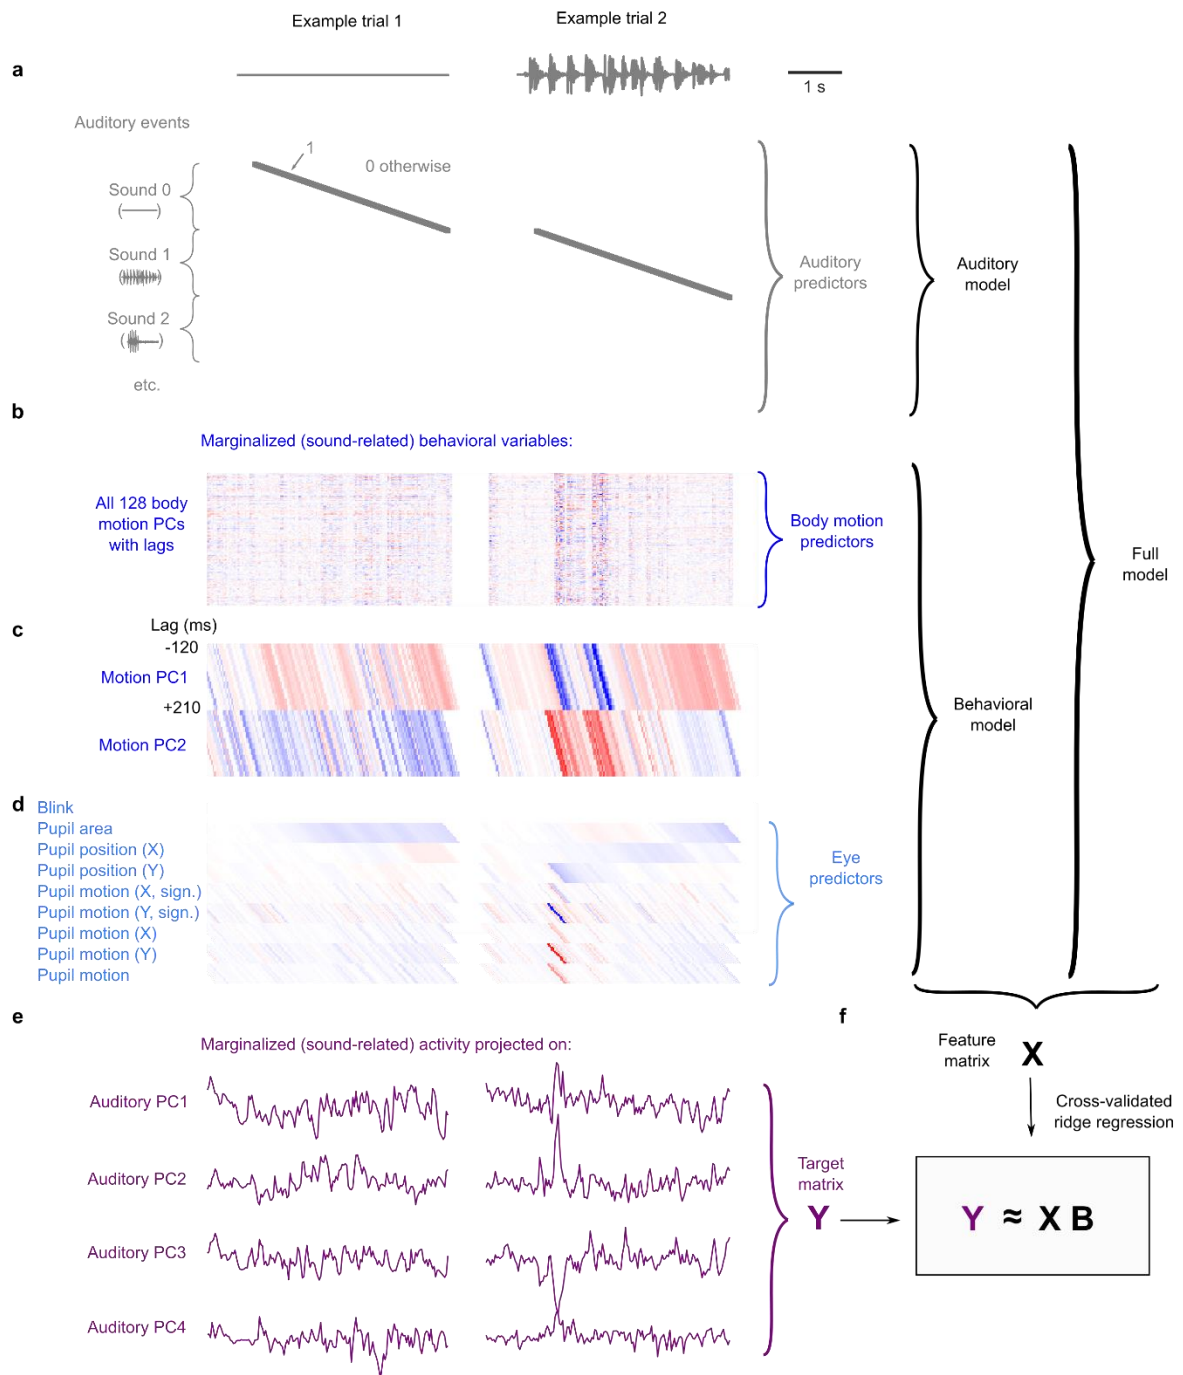

Supplementary Fig. 3. **Structure of the models.** **a.** The feature matrix for the auditory model involves only the auditory predictors. It is 1 in the time bins during which a sound is played (grey dots), and 0 otherwise. **b.** The feature matrix for the behavioral model includes all 128 motions PCs with 12 lags (from -120 to +210 ms). **c.** A closeup for the first 2 motion PCs allows for a better visualization of the predictors with different lags. **d.** Same as **b**, but for various eye variables. The same lags are used. **e.** The target matrix  $Y$  is composed of the projections of the marginalized activity (sound responses only) onto the sound-related subspace (first 4 auditory PCs). **f.** The feature matrix  $X$  depends on the model: auditory, behavioral, or full model (which combines both the auditory and the behavioral predictors). It is fitted to the target matrix  $Y$  using 3-fold cross-validated ridge regression to obtain the matrix of regression weights  $B$ .
